# Supplementary material for: Phase-dependent electronic structure modulation of nickel selenides by Fe doping for enhanced bifunctional oxygen electrocatalysis
Source: Royal Society of Chemistry journal article supplement (doi:10.1039/d4nr04047c), 2025-01-01
Supplement: d4nr04047c1.pdf [file d4nr04047c1.pdf]

**Phase-Dependent Electronic Structure Modulation of Nickel Selenides by Fe Doping for Enhanced Bifunctional Oxygen Electrocatalysis**

**Vigneshraaj A S<sup>a,b</sup>, Siva Kumar Ramesh<sup>c</sup>, Jinkwon Kim<sup>c</sup>, Kavita Pandey<sup>\*a,b</sup>**

<sup>a</sup>Centre for Nano and Soft Matter Sciences (CeNS), Shivanapura, Bengaluru 562162, India

<sup>b</sup>Academy of Scientific and Innovative Research (AcSIR), Ghaziabad, 201002, India

<sup>c</sup>Department of Chemistry, Kongju National University, 56 Gongjudaehak-ro, Gongju-si, Chungnam-do 32588, South Korea

Corresponding author: E-mail: [kavitapandey@cens.res.in](mailto:kavitapandey@cens.res.in)

Figure S1. XRD pattern of NiFe-NTA

Figure S2. XRD pattern of NiFe-NC-800

Figure S3. (a) TEM images of NF-NC@800 (b-f) HAADF-Elemental mapping of  $\text{Ni}_{3-x}\text{Fe}_x\text{Se}_4\text{-NC@550}$

Figure S4. XRD pattern and FESEM images of (a, b)  $\text{NiSe}_2\text{-NC@400}$ , and (c,d)  $\text{Ni}_3\text{Se}_4\text{-NC@550}$

Fig. S5 EDAX images of (a.) NFSe-NC@400 (b.) NFSe-NC@550

Figure S6. XPS spectra of (a,e) Ni 2p, (b,f) Se 3d, (c,g) N 1s, (d,h) C 1s of NSe-NC@400 and NSe-NC@550

Figure S7. Raman spectra of NFSe-NC@400

Figure S8. Effect of mass loading of NFSe-NC@400 (a.) OER (b.) ORR

Figure S9. CA study of NFSe-NC@400 for Tafel slope in the catalytic turnover region.

Figure S10. CV curves at various scan rates (a) NFSe-NC@400, (b) NSe-NC@400, (c) NFSe-NC@550, and (d) NSe-NC@550.

Figure S11. LSV curves for the redox reaction of 10 mM ferro-ferricyanide in 1M NaOH at various rpm in RRDE.

Figure S12. XRD patterns of NFSe-NC@400 before and after the stability test.

Figure S13. FESEM images of NFSe-NC@400 after the stability test.

Figure S14. XPS spectrum of (a) Ni 2p, (b) Fe 2p, (c) Se 3d, and (d) O 1s of NFSe-NC@400 before and after the stability test.

Figure S15. Valence band spectra of NFSe-NC@400, NFSe-NC@550, NSe-NC@400, and NSe-NC@400 measured by XPS.

Figure S16. Proposed Mechanism for (a.) OER (b.) ORR

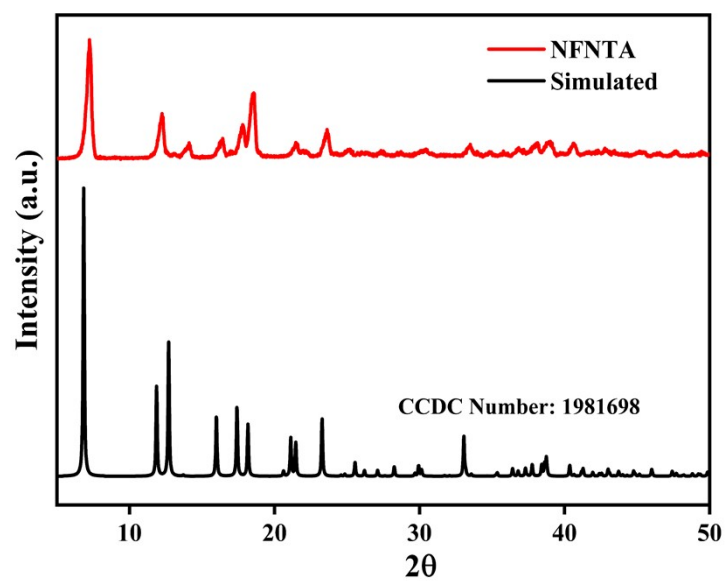

Figure S1. XRD pattern of NiFe-NTA

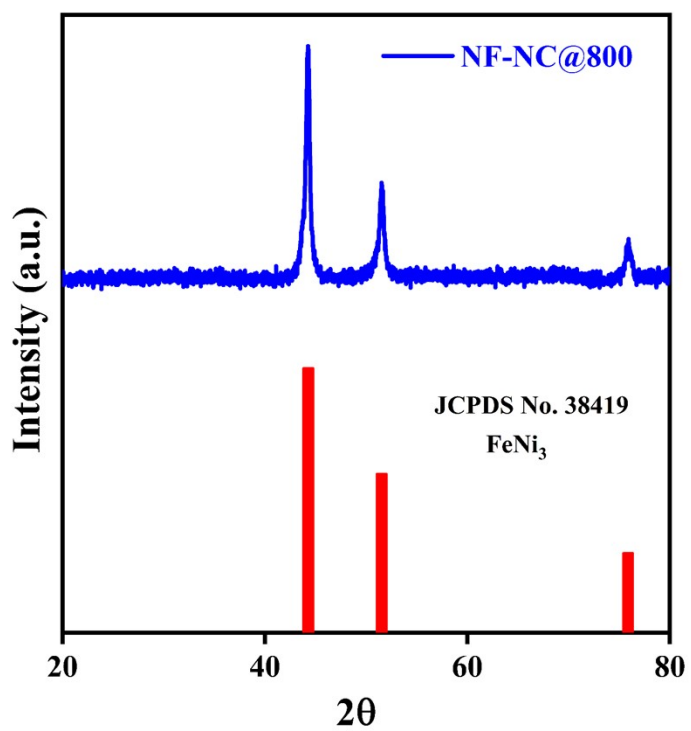

Figure S2. XRD pattern of NiFe-NC-800

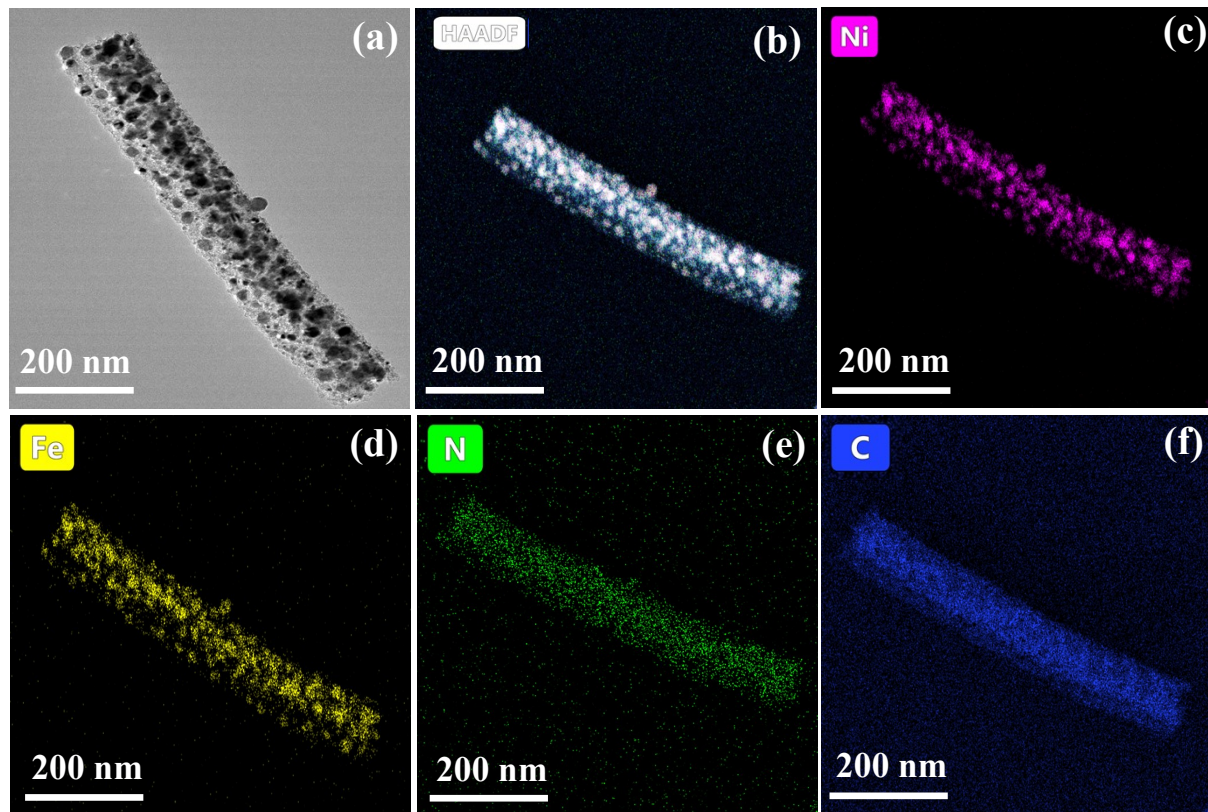

Figure S3. (a) TEM images of NF-NC@800 (b-f) HAADF-Elemental mapping of  $\text{Ni}_{3-x}\text{Fe}_x\text{Se}_4\text{-NC@550}$

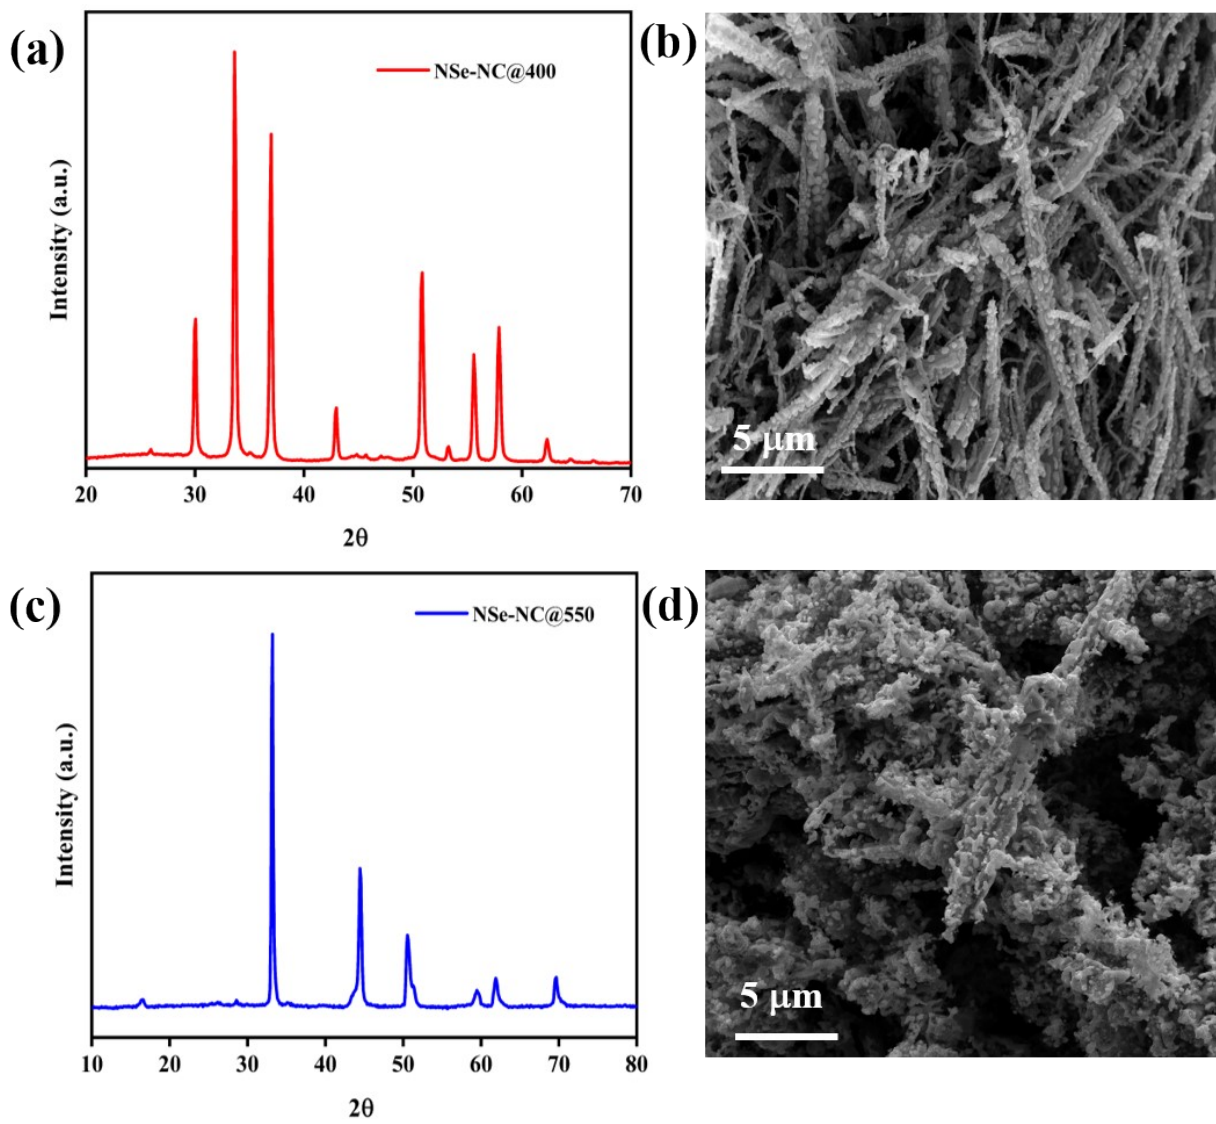

Figure S4. XRD pattern and FESEM images of (a, b) NiSe<sub>2</sub>-NC@400, and (c,d) Ni<sub>3</sub>Se<sub>4</sub>-NC@550

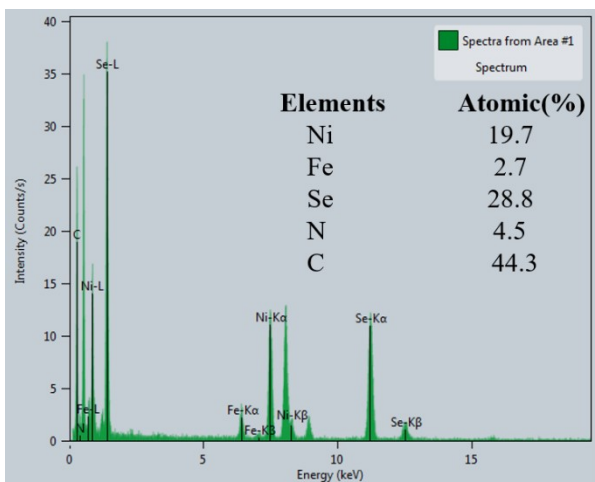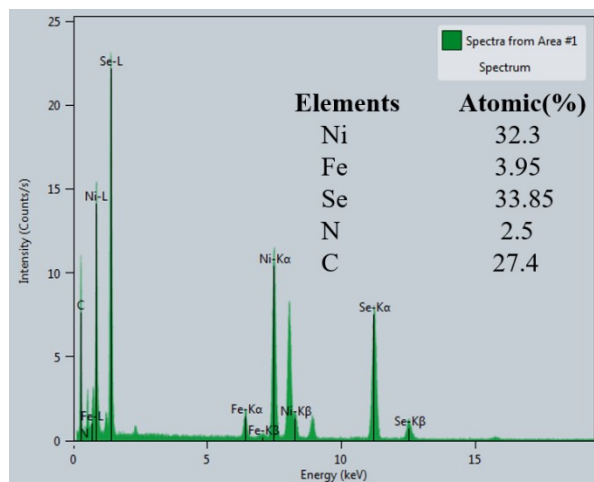

**Fig. S5. EDAX images of (a.) NFSe-NC@400 (b.) NFSe-NC@550**

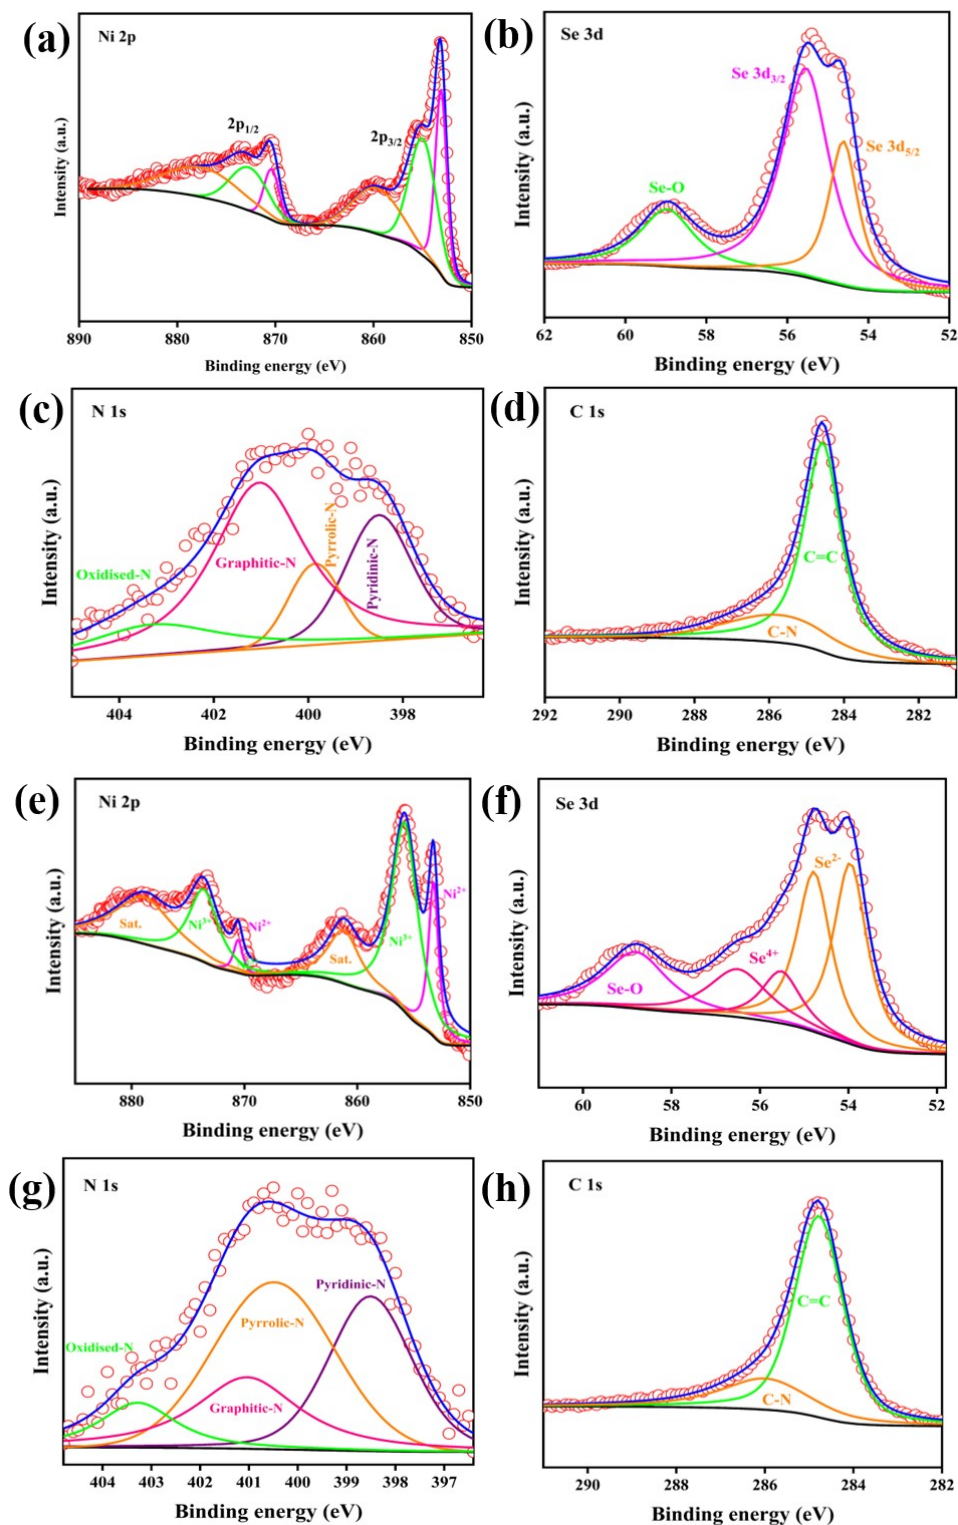

Figure S6. XPS spectra of (a,e) Ni 2p, (b,f) Se 3d, (c,g) N 1s, (d,h) C 1s of NSe-NC@400 and NSe-NC@550

### **XPS analysis of NSe-NC@400, and NSe-NC@550:**

Further, Ni 2p of NSe-NC@400 (Fig.S6a), which has NiSe<sub>2</sub> phase without Fe doping, is deconvoluted and has six peaks, including two satellite peaks at 877.5 and 859.8 eV. As indicated in Figure S6a, two peaks attributed at 853.4 and 870.5 eV represent Ni<sup>2+</sup> ions and two more peaks centered at 855.4 and 872.6 eV represent oxidized Ni peaks. Further, Se 3d (Figure S6b), N 1s (Figure S6c), and C 1s (Figure S6d) of NSe-NC@400 are in a similar fashion to NSe-NC@400. The Ni2p of NSe-NC@550 is also deconvoluted into six peaks, and Ni2p<sub>3/2</sub> is centered at 855.8 and 853.2 eV corresponds to Ni<sup>3+</sup> and Ni<sup>2+</sup> and Ni 2p<sub>1/2</sub> centered at 873.6 and 870.5 eV represents Ni<sup>3+</sup> and Ni<sup>2+</sup> respectively. As shown in Figure S6e, Ni2p has two more peaks representing the satellite peak at 861.2 and 878.8 eV. Further, Se 3d (Figure S6f), N 1s (Figure S6g), and C 1s (Figure S6h) of NSe-NC@550 were similar in fashion to NSe-NC@550.



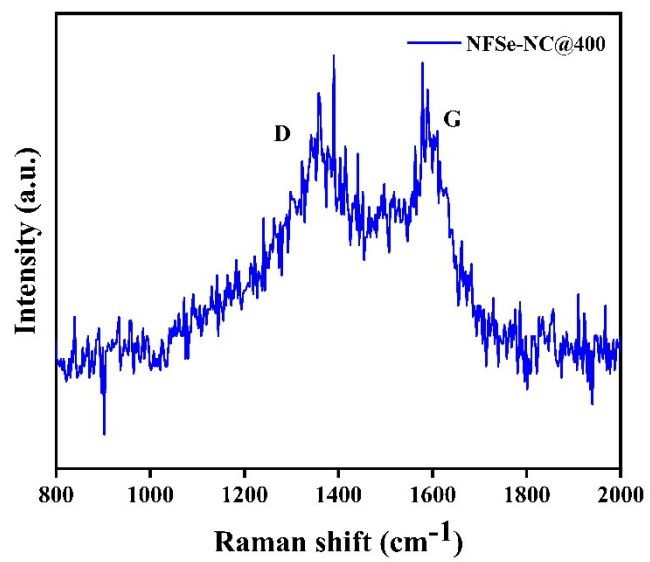

**Figure S7. Raman spectra of NFSe-NC@400**

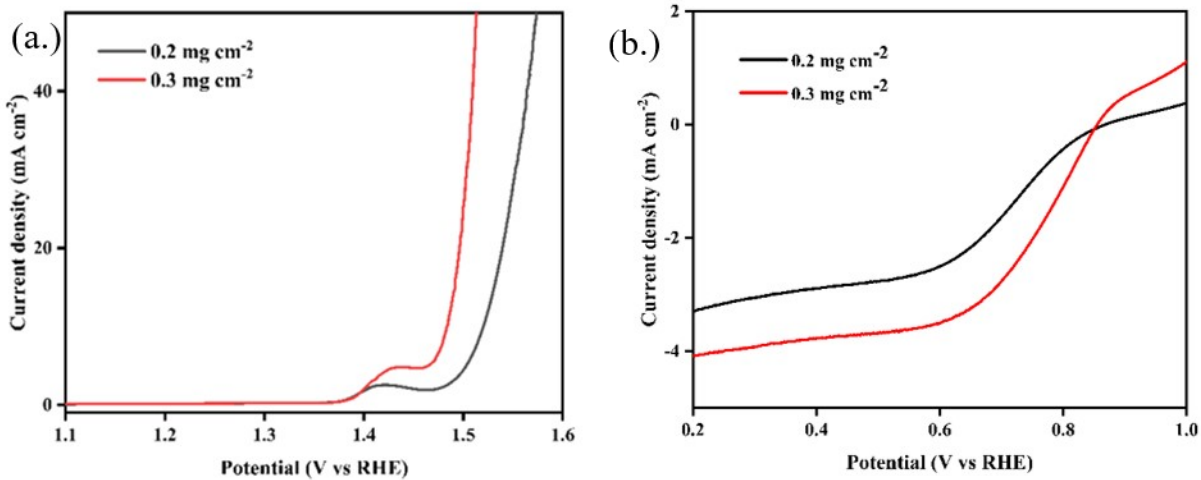

**Figure S8. Effect of mass loading of NFSe-NC@400 (a.) OER (b.) ORR**

The increment of mass loading tends to higher electrocatalytic OER and ORR activity.<sup>1,2</sup>

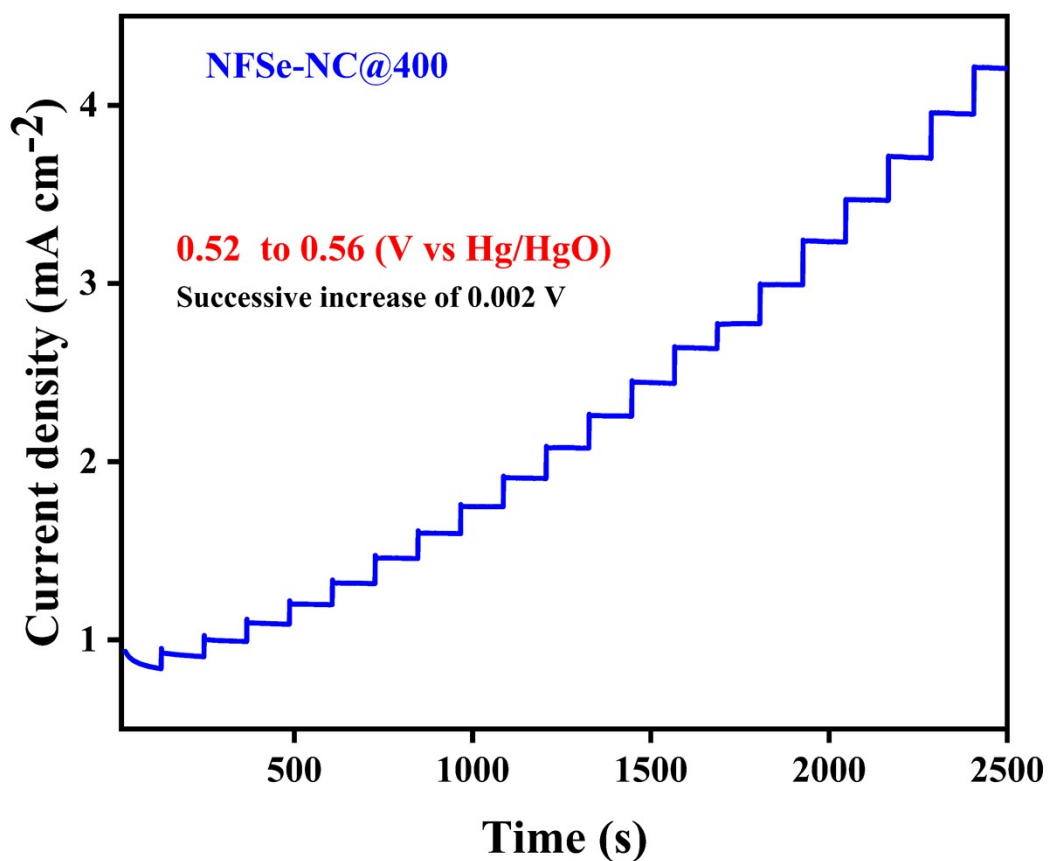

**Figure S9. CA study of NFSe-NC@400 for Tafel slope in the catalytic turnover region**

Chronoamperometry (steady state) is used to determine the Tafel analysis, as the polarization curve does not represent the steady state.<sup>3</sup>

So, we used CA for analyzing the tafel plot for all samples. It shows the CA study from 0.52 to 0.56 V (vs Hg/HgO) of NFSe-NC@400 for the successive increase of 0.002V. Similarly, we have done CA for all other samples.

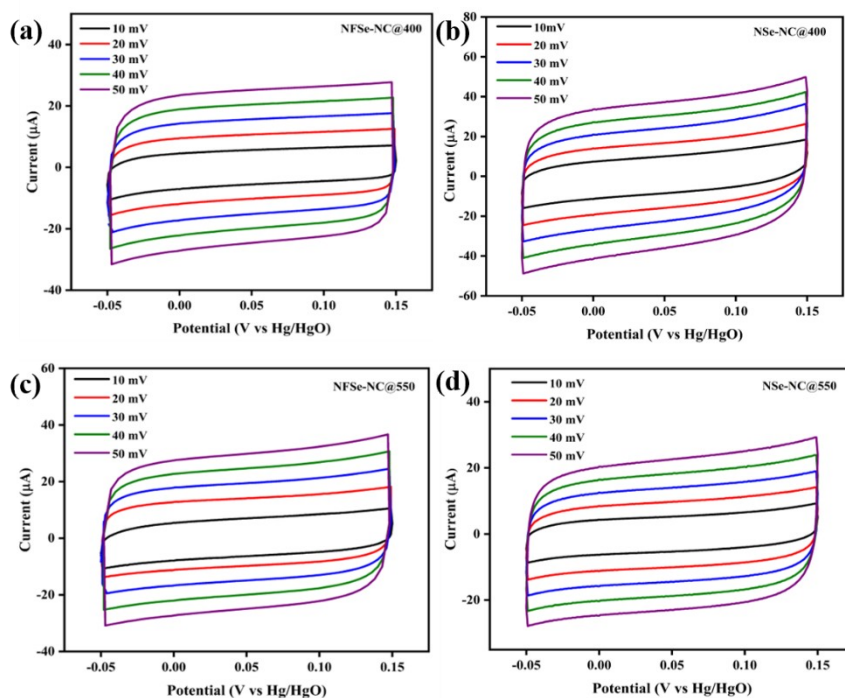

**Figure S10. CV curves at various scan rates (a) NFSe-NC@400, (b) NSe-NC@400, (c) NFSe-NC@550, and (d) NSe-NC@550.**

**ECSA calculation:**

Double layer capacitance is calculated by,

$$C_{dl} = \frac{1}{2} (j_a - j_c), j_a \text{ and } j_c \text{ is anodic and cathodic current density}$$

Slope obtained from capacitive current against scan rates (Fig. 6d) is used to calculate  $C_{dl}$

For, NFSe-NC@400, Slope =  $j_a - j_c = 971 \mu F$ ;  $C_{dl} = \frac{1}{2} (971) = 485.5 \mu F \text{ cm}^{-2}$

NSe-NC@400, Slope =  $j_a - j_c = 1370 \mu F$ ;  $C_{dl} = \frac{1}{2} (1370) = 685 \mu F \text{ cm}^{-2}$

NFSe-NC@550, Slope =  $j_a - j_c = 1028 \mu F$ ;  $C_{dl} = \frac{1}{2} (1028) = 514 \mu F \text{ cm}^{-2}$

NSe-NC@550, Slope =  $j_a - j_c = 870 \mu F$ ;  $C_{dl} = \frac{1}{2} (870) = 435 \mu F \text{ cm}^{-2}$

Electrochemical Surface Area (ECSA) can be calculated by following the formula

$$\text{ECSA} = C_{dl}/C_{sp},$$

$C_{sp}$  represents average specific capacitance, and  $C_{sp}$  is of about  $40 \mu\text{F cm}^{-2}$ .<sup>4</sup>

For, NFSe-NC@400, ECSA= 12.13

NSe-NC@400, ECSA= 17.12

NFSe-NC@550, ECSA= 12.85

NSe-NC@550, ECSA= 10.87

**Turn Over Frequency (TOF) calculation:**

$$\text{TOF} = \frac{J \times \text{Surface Area}}{4 \times F \times n}$$

TOF of each active site ( $\text{s}^{-1}$ ) can be calculated by the following equation:  
 $n = \frac{\text{Mass loading}}{\text{molecular weight}}$

Where J represents current density at 1.49 V, F is the Faraday constant ( $96485 \text{ C mol}^{-1}$ ), and n is the number of active sites.

**Exchange current density:**

Exchange current density is the important parameter for the intrinsic activity of the catalyst and can be calculated by the intersection of the Tafel zone tangent and line of  $E = E_0$  (For OER  $E_0 = 1.23 \text{ V vs RHE}$ ).

$$I = I_0 \left[ \exp\left(\alpha A \frac{nF}{RT} \times \eta\right) - \exp\left(-\alpha C \frac{nF}{RT} \times \eta\right) \right]$$

$$\ln I = \ln I_0 + \left( \frac{\alpha AnF}{RT} \right) \eta$$

Here,  $I$  stands for the current density,  $I_0$  is the exchange current density, *i.e.* the current at equilibrium potential,  $n$  is the number of electrons involved in the reaction ( $n=4$ ),  $F$  is the Faraday constant ( $96\,485\text{ C mol}^{-1}$ ),  $T$  is the absolute temperature in Kelvin,  $\eta$  is the overpotential,  $a_A$  and  $a_C$  are the charge transfer coefficients for anodic reaction (OER), and cathodic reaction (HER) and  $R$  is the gas constant.

A higher exchange current density signifies a superior electrocatalyst. This value is determined by extrapolating the linear fit in the Tafel slope, where the equilibrium potential of the OER process intersects the logarithmic current density scale. A higher exchange current density reveals the intrinsic rate of reaction transfer between the electrode and electrolyte under equilibrium conditions. It is influenced by the electrocatalyst material, the analyte in the solution, and the temperature.<sup>5</sup>

#### **Calculation of Faradaic efficiency:**

Selectivity is one of the important qualities in electrocatalysis, and it can be screened by faradaic efficiency. A reliable electrochemical technique to determine faradaic efficiency is Rotating Ring Disk Electrode (RRDE). The oxygen molecule evolving from the glassy carbon disk electrode will be reduced to a water molecule by the Platinum ring electrode by applying a constant potential. It is calculated by following the equation,

Faradaic efficiency =  $I_r \times n_d / I_d \times n_r \times N_{CL}$

$I_r$  is the ring current,  $I_d$  is the disk current,  $n_d$  is the number of electrons transferred in disk electrode ( $n_d=4$  electron transferred during OER),  $n_r$  is the number of electrons transferred in ring electrode ( $n_r=4$  electron transferred during ORR by Pt electrode) and  $N_{CL}$  is collection efficiency.

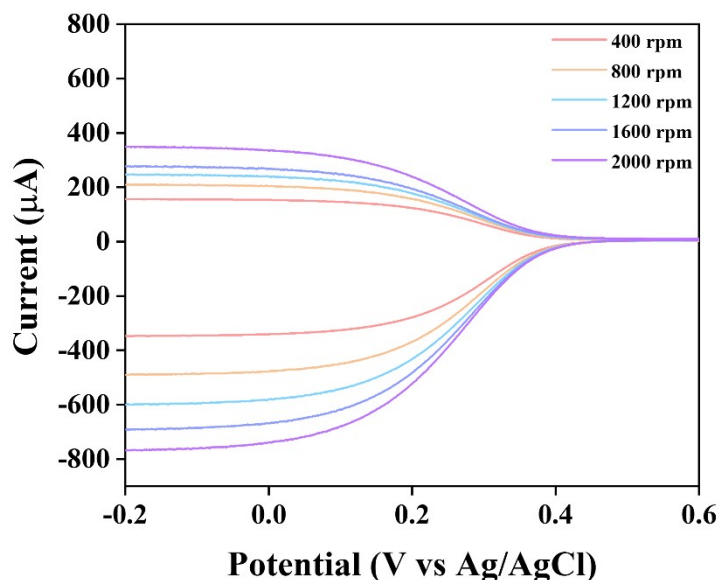

**Collection Efficiency determination:**

**Figure S11. LSV curves for the redox reaction of 10 mM Ferro-ferricyanide in 1M NaOH at various rpm in RRDE**

The collection efficiency ( $N_{CL}$ ) is determined by the redox reaction of 10 mM ferro-ferricyanide using RRDE in 1M NaOH at  $5 \text{ mV s}^{-1}$  under different rotation rates in an  $N_2$  atmosphere. The  $N_{CL}$  is the ratio of ring current to disk current.

$$N_{CL} = I_r / I_d, I_r \text{ is the ring current, and } I_d \text{ is the disk current.}$$

It is determined by taking the  $I_d$  and  $I_r$  at  $-0.1 \text{ V vs Ag/AgCl}$  from the above LSV curves and calculated as  $N_{CL} = 0.42$ .

**NFSe-NC@400:**

Faradaic efficiency of NFSe-NC@400 (Fig. 7d) is calculated by applying disk potential ( $E_d = 1.59 \text{ V vs RHE}$ ) and ring potential ( $E_r = 0.4 \text{ V vs RHE}$ ) at 1600 rpm and at 150s it is calculated as,

$$\text{Faradaic efficiency of NFSe-NC@400} = 2.74 \times 10^{-4} / (6.79 \times 10^{-4} \times 0.42)$$

$$\text{Faradaic efficiency of NFSe-NC@400} = 96 \%$$

### **k-L plot for ORR:**

The kinetic parameters of the catalyst during the ORR process were evaluated using a k-L plot, where the inverse of the current density ( $J^{-1}$ ) is plotted against the inverse of the square root of the rotation speed ( $\omega^{-1/2}$ ) at different potentials. The conversion from rpm to rad/s is provided in Equation S1. The slope of the best linear fit was used to calculate the number of electrons ( $n$ ) involved in the oxygen reduction process based on the k-L equation.

$$\omega_{(\text{rad s}^{-1})} = 2\pi/60 N_{\text{rpm}} \quad (\text{S1})$$

$$\frac{1}{J} = \frac{1}{J_L} + \frac{1}{J_k} = \frac{1}{\sqrt{B}\omega} + \frac{1}{J_k} \quad (\text{S2})$$

$$B = 0.62nFC_0(D_0)^{2/3}\nu^{-1/6} \quad (\text{S3})$$

Where  $J$  is the limiting current density in  $\text{A}\cdot\text{cm}^{-2}$ ,  $J_k$  and  $J_L$  are the kinetic and diffusion current density,  $F$  is the Faraday constant ( $96485 \text{ C}\cdot\text{mol}^{-1}$ ),  $C_0$  is the saturation concentration of  $\text{O}_2$  in 0.1 M KOH ( $1.2 \times 10^{-6} \text{ mol cm}^{-3}$ ) at room temperature,  $D_0$  is the diffusion coefficient ( $1.93 \times 10^{-5} \text{ cm}^2 \text{ s}^{-1}$ ) of  $\text{O}_2$  and  $\nu$  is the kinematic viscosity of the electrolyte ( $0.01 \text{ cm}^2\text{s}^{-1}$ ),  $\omega$  is the rotation rate,  $\text{rad}\cdot\text{s}^{-1}$ . The number of electrons is determined from the slope and  $J_k$  using intercept at the y-axis of the k-L plot.<sup>6</sup>

### **RRDE measurement for calculating $n$ and % of $\text{H}_2\text{O}_2$ produced:**

Rotating Ring Disk Electrode (RRDE) is also used to determine the number of electrons and % of  $\text{H}_2\text{O}_2$  yield. It can be calculated by following the equation,

$$n = 4 \frac{I_D}{I_D + I_R/N} \quad (\text{S4})$$

$$\% \text{H}_2\text{O}_2 = 200 \frac{I_R/N}{I_D + I_R/N} \quad (\text{S5})$$

$I_D$  is the disk current,  $I_R$  is the ring current, and  $N$  is the collection efficiency.



In the RRDE experiment, the Pt ring was held at a potential of 1.26 V vs. RHE, covering a wide range of ORR disk potentials.

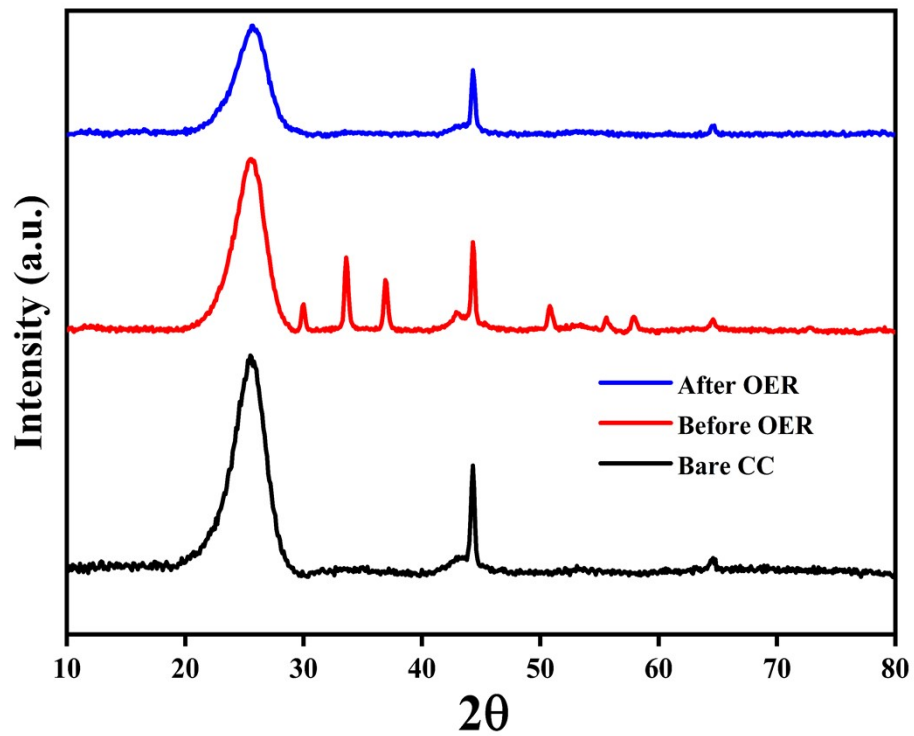

Figure S12. XRD patterns of NFSe-NC@400 before and after the stability test

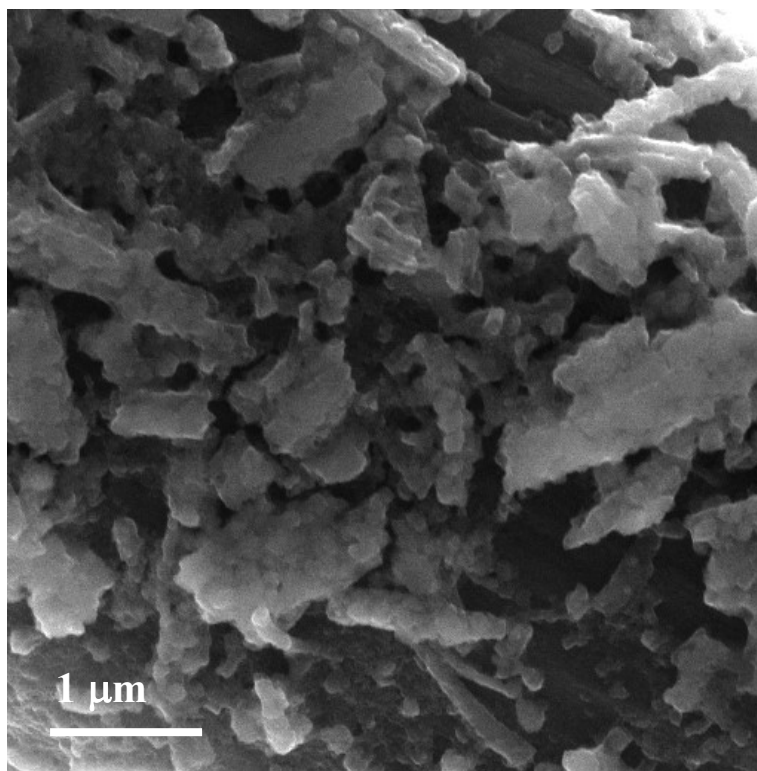

**Figure S13. FESEM images of NFSe-NC@400 after the stability test**

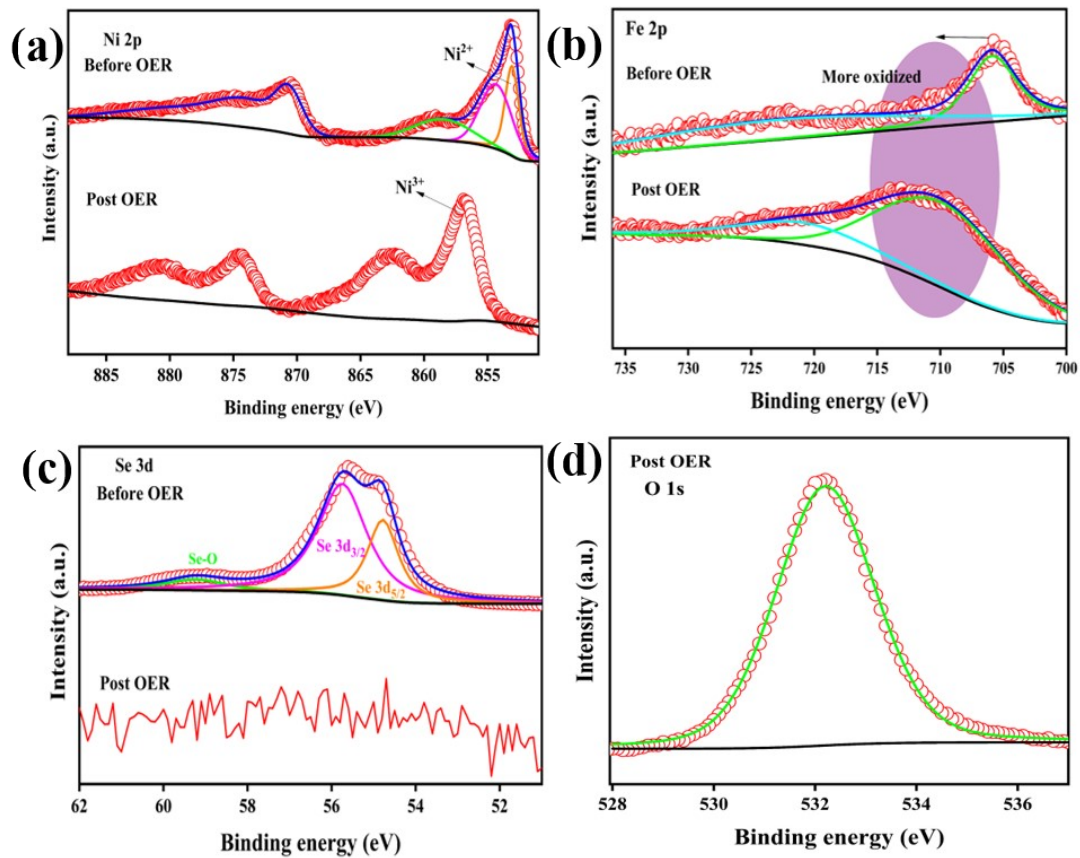

Figure S14. XPS spectrum of (a) Ni 2p, (b) Fe 2p, (c) Se 3d, and (d) O 1s of NFSe-NC@400 before and after the stability test

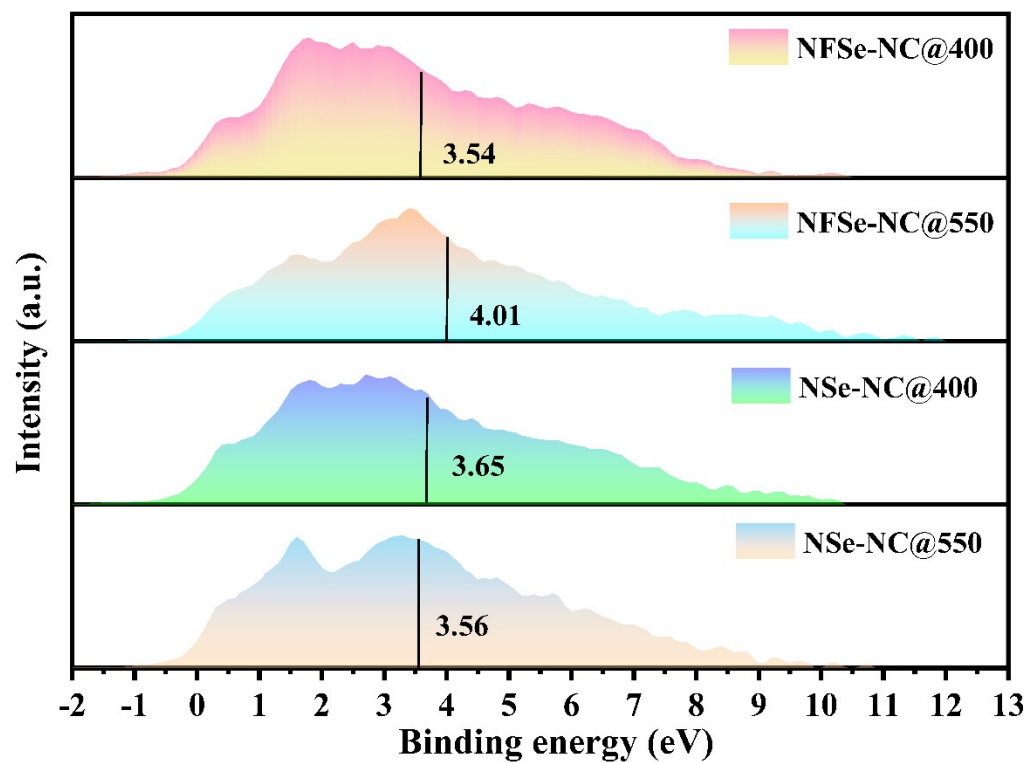

**Figure S15. Valence band spectra of NFSe-NC@400, NFSe-NC@550, NSe-NC@400, and NSe-NC@550 measured by XPS.**

The d-band center position is marked by the horizontal bar in plots.

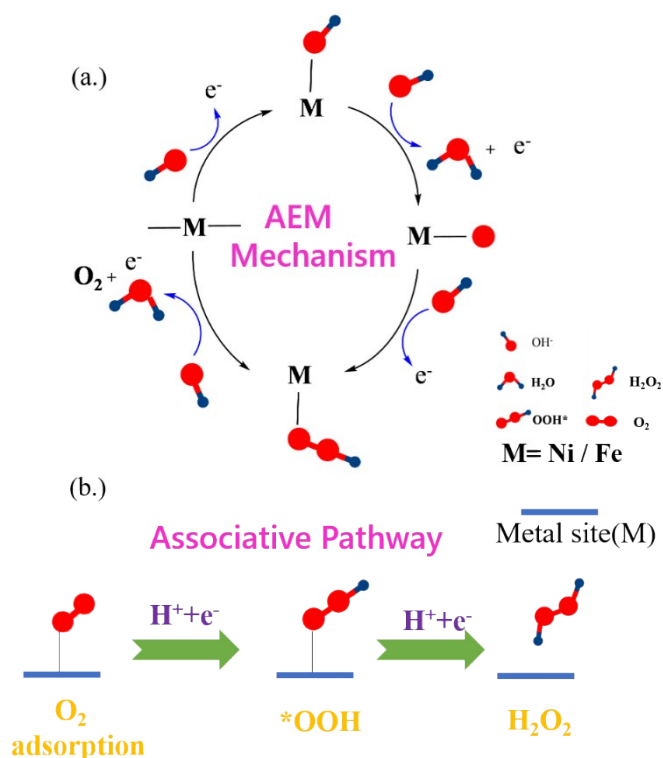

**Fig. S16. Proposed Mechanism for (a.) OER (b.) ORR**

The probable mechanism and pathway of OER are illustrated in Fig. S16a. The active metal site (Ni/Fe) initially adsorbs  $\text{OH}^-$  ions, followed by the deprotonation of the hydroxyl ligand coordinated to the catalytic site. This is succeeded by a catalytic oxidation step, leading to the formation of a hydroperoxide intermediate ( $\text{*OOH}$ ). The process ultimately leads to the evolution of  $\text{O}_2$  from  $\text{*OOH}$  through a four-electron transfer mechanism.<sup>7</sup> The expected mechanism and pathway of ORR are illustrated in Fig. S16b. The Oxygen Reduction Reaction (ORR) typically proceeds through either an associative or dissociative pathway, depending on the mode of oxygen adsorption. In the associative pathway, peroxide formation is favored, beginning with the adsorption of the  $\text{O}_2$  molecule onto the catalyst surface via the Pauling mode. This is followed by  $\text{O}_2$  adsorption facilitating the generation of  $\text{*OOH}$ . Moderate  $\text{*OOH}$  adsorption promotes the reaction, whereas stronger  $\text{*OOH}$  adsorption leads to unfavorable peroxide formation. The process concludes with the reduction of  $\text{*OOH}$  to  $\text{H}_2\text{O}_2$ .<sup>8</sup>

**Table S1. Comparison of electrochemical OER performances of various electrocatalysts in 1 M KOH solution.**

| S.No. | Electrocatalysts                                                           | Overpotential (mV) at 10 mA cm <sup>-2</sup> | Tafel Slope mV/dec | References |
|-------|----------------------------------------------------------------------------|----------------------------------------------|--------------------|------------|
| 1.    | Fe <sub>0.25</sub> Ni <sub>0.75</sub> Se <sub>2</sub>                      | 275                                          | 74.8               | 9          |
| 2.    | NiSe <sub>2</sub> /CFP                                                     | 280                                          | 81                 | 10         |
| 3.    | MOF derived Fe doped Ni <sub>3</sub> Se <sub>4</sub> /NiSe <sub>2</sub>    | 294                                          | 49.02              | 11         |
| 4.    | NiSe <sub>2</sub> -FeSe-DHPs                                               | 280                                          | 58                 | 12         |
| 5.    | Fe-NiS <sub>2</sub> @NC                                                    | 255                                          | 65                 | 13         |
| 6.    | MOF derived Ni-Fe-Se/CFP                                                   | 281                                          | 40.93              | 14         |
| 7.    | Ni <sub>0.75</sub> Fe <sub>0.25</sub> Se <sub>2</sub> nanosheets/CFC       | 255                                          | 47.2               | 15         |
| 8.    | Ni <sub>x</sub> Fe <sub>1-x</sub> Se <sub>2</sub> porous-nano-microspheres | 285                                          | 90                 | 16         |
| 9.    | Ni <sub>x</sub> Co <sub>1-x</sub> Se <sub>2</sub> hollow micro-particles   | 320                                          | 78                 | 17         |
| 10.   | Ni <sub>x</sub> Fe <sub>1-x</sub> Se <sub>2</sub> -NC@400                  | 253                                          | 57.1               | This work  |

**Table S2. Comparison of electrochemical ORR performances of various electrocatalysts in 0.1 M KOH solution.**

| <b>S.No.</b> | <b>Electrocatalysts</b>                                   | <b>Tafel slope<br/>mV/dec</b> | <b>References</b> |
|--------------|-----------------------------------------------------------|-------------------------------|-------------------|
| 1.           | Ni <sub>1-x</sub> Se                                      | 55                            | 18                |
| 2.           | Ni <sub>0.85</sub> Se/Co <sub>0.85</sub> Se-NHCS          | 58.2                          | 19                |
| 3.           | NiCo <sub>2</sub> S <sub>4</sub> @NiFe LDH                | 46.5                          | 20                |
| 4.           | NC@Co-NGC DSNCs                                           | 51                            | 21                |
| 5.           | Fe <sub>2</sub> NiSe <sub>4</sub> @Fe-NC                  | 107.6                         | 22                |
| 6.           | NiFe/N-doped 3D porous carbon<br>nanosheet                | 84                            | 23                |
| 7.           | NiFe-NC                                                   | 63                            | 24                |
| 8.           | Ni <sub>x</sub> Fe <sub>1-x</sub> Se <sub>2</sub> -NC@400 | 34.8                          | This work         |

## References:

- 1 L. Yu, S. Sun, H. Li and Z. J. Xu, *Fundamental Research*, 2021, **1**, 448–452.
- 2 W. Xie, Z. Li, S. Jiang, J. Li, M. Shao and M. Wei, *Chemical Engineering Journal*, 2019, **373**, 734–743.
- 3 S. Anantharaj and S. Noda, *Mater Today Energy*, 2022, **29**, 101123.
- 4 C. C. L. McCrory, S. Jung, J. C. Peters and T. F. Jaramillo, *J Am Chem Soc*, 2013, **135**, 16977–16987.
- 5 A. Raveendran, M. Chandran and R. Dhanusuraman, *RSC Adv*, 2023, **13**, 3843–3876.
- 6 T. Radhakrishnan, M. P. Aparna, R. Chatanathodi and N. Sandhyarani, *ACS Appl Nano Mater*, 2019, **2**, 4480–4488.
- 7 A. Raveendran, M. Chandran and R. Dhanusuraman, *RSC Adv*, 2023, **13**, 3843–3876.
- 8 M. Song, W. Liu, J. Zhang, C. Zhang, X. Huang and D. Wang, *Adv Funct Mater*, 2023, **33**, 2212087.
- 9 A. Kareem and S. Senthilkumar, *Int J Hydrogen Energy*, 2023, **48**, 7374–7384.
- 10 L. Zhai, C. H. Mak, J. Qian, S. Lin and S. P. Lau, *Electrochim Acta*, 2019, **305**, 37–46.
- 11 K. Srinivas, F. Ma, Y. Liu, Z. Zhang, Y. Wu and Y. Chen, *ACS Appl Mater Interfaces*, 2022, **14**, 52927–52939.
- 12 S. K. Ramesh, V. Ganesan and J. Kim, *ACS Appl Energy Mater*, 2021, **4**, 12998–13005.
- 13 F. Wen, L. Pang, T. Zhang, X. Huang, C. Li and H. Liu, *Int J Hydrogen Energy*, 2024, **57**, 263–272.
- 14 Y. Guo, C. Zhang, J. Zhang, K. Dastafkan, K. Wang, C. Zhao and Z. Shi, *ACS Sustain Chem Eng*, 2021, **9**, 2047–2056.
- 15 Z. Wang, J. Li, X. Tian, X. Wang, Y. Yu, K. A. Owusu, L. He and L. Mai, *ACS Appl Mater Interfaces*, 2016, **8**, 19386–19392.
- 16 Y. Li, R. Chen, D. Yan and S. Wang, *Chem Asian J*, 2020, **15**, 3845–3852.
- 17 D. V. Shinde, L. De Trizio, Z. Dang, M. Prato, R. Gaspari and L. Manna, *Chemistry of Materials*, 2017, **29**, 7032–7041.



- 18 H. Zhang, S. Zheng, J. Tang, R. Chen, J. Yang, W. Tong and J. Guo, *New Journal of Chemistry*, 2023, **47**, 11675–11684.
- 19 L. J. Peng, J. P. Huang, Q. R. Pan, Y. Liang, N. Yin, H. C. Xu and N. Li, *RSC Adv*, 2021, **11**, 19406–19416.
- 20 X. Feng, Q. Jiao, W. Chen, Y. Dang, Z. Dai, S. L. Suib, J. Zhang, Y. Zhao, H. Li and C. Feng, *Appl Catal B*, 2021, **286**, 119869.
- 21 S. Liu, Z. Wang, S. Zhou, F. Yu, M. Yu, C.-Y. Chiang, W. Zhou, J. Zhao, J. Qiu, S. H. Liu, Z. Y. Wang, M. Z. Yu, J. S. Qiu, S. Zhou, J. J. Zhao, F. J. Yu, C. Chiang and W. Z. Zhou, *Advanced Materials*, 2017, **29**, 1700874.
- 22 S. Ibraheem, S. Chen, L. Peng, J. Li, L. Li, Q. Liao, M. Shao and Z. Wei, *Appl Catal B*, 2020, **265**, 118569.
- 23 X. Lu, M. Wu, Z. Lu, J. Hu, J. Xie, A. Hao and Y. Cao, *J Alloys Compd*, 2023, **942**, 169095.
- 24 B. Ricciardi, W. da Silva Freitas, B. Mecheri, K. U. Nisa, J. Montero, V. C. A. Ficca, E. Placidi, C. Alegre and A. D’Epifanio, *Carbon N Y*, 2024, **219**, 118781.
